# Supplementary material for: Metal ion exchange in Prussian blue analogues: Cu(ii)-exchanged Zn–Co PBAs as highly selective catalysts for A3 coupling
Source: Royal Society of Chemistry journal article supplement (doi:10.1039/c9dt00388f), 2019-01-01
Supplement: c9dt00388f1.pdf [file c9dt00388f1.pdf]

## Supporting information

### Metal ion exchange in Prussian blue analogues: Cu(II)-exchanged Zn-Co PBAs as highly selective catalysts for A<sup>3</sup> coupling

Carlos Marquez, Francisco G. Cirujano, Simon Smolders, Cédric Van Goethem, Ivo Vankelecom, Dirk De Vos\*, and Trees De Baerdemaeker\*

Centre for Surface Chemistry and Catalysis, KU Leuven, Celestijnenlaan 200F, 3001 Leuven, Belgium.

\*Corresponding authors: [dirk.devos@kuleuven.be](mailto:dirk.devos@kuleuven.be); [trees.debaerdemaeker@kuleuven.be](mailto:trees.debaerdemaeker@kuleuven.be).

## Table of content

|                                                                                                                    |    |
|--------------------------------------------------------------------------------------------------------------------|----|
| Synthesis of Cu <sub>x</sub> Zn <sub>1-x</sub> -Co PBAs by co-precipitation                                        | 2  |
| Preparation of Cu(II)-supported materials                                                                          | 2  |
| Nitroaldol (Henry) reaction                                                                                        | 2  |
| Elemental analysis of Zn(II) exchanged samples                                                                     | 3  |
| Solution pH during the Cu(II) exchange process                                                                     | 4  |
| UV/vis spectra                                                                                                     | 5  |
| Additional XRD patterns                                                                                            | 6  |
| Nitrogen physisorption and textural properties                                                                     | 7  |
| Difference IR spectra of adsorbed pyridine                                                                         | 8  |
| TGA profiles                                                                                                       | 8  |
| TGA-MS profile of [Cu(OAc) <sub>2</sub> ] <sub>0.90</sub> @Zn <sub>0.10</sub> -Co PBA                              | 9  |
| FTIR spectra                                                                                                       | 10 |
| Additional catalytic data for the A <sup>3</sup> coupling reaction of phenylacetylene, piperidine and benzaldehyde | 11 |
| Catalytic data for the Nitroaldol (Henry) reaction                                                                 | 12 |
| Hot filtration test                                                                                                | 12 |
| Recycling test                                                                                                     | 13 |
| XRD pattern of [Cu(OAc) <sub>2</sub> ] <sub>0.90</sub> @Zn <sub>0.10</sub> -Co PBA after reaction                  | 13 |
| References                                                                                                         | 14 |

## Synthesis of $\text{Cu}_x\text{Zn}_{1-x}\text{-Co}$ PBAs by co-precipitation

$\text{Cu}_x\text{Zn}_{1-x}\text{-Co}$  PBAs were synthesized following previously reported procedures.<sup>1</sup> In short, a solution of  $\text{K}_3[\text{Co}(\text{CN})_6]$  (0.1 M, 15 ml) was mixed with a solution (150 ml) containing specific amounts of  $\text{CuCl}_2 \cdot 2\text{H}_2\text{O}$  and  $\text{ZnCl}_2$  (15 mmol in total). After stirring for 3 h, the precipitate was recovered by centrifugation, washed three times with distilled water and dried at 60°C overnight.

## Preparation of Cu(II) based catalysts

Silica gel (Sigma-Aldrich, high purity grade, pore size 150 Å, 200–425 mesh), commercial Beta zeolite (CP811BL25, Si/Al = 12.5) and MCM-41 (synthesized following the procedure reported by Grün et al.<sup>2</sup>) were dispersed (5 g/L) in 50 mM aqueous solutions of  $\text{Cu}(\text{CH}_3\text{COO})_2 \cdot \text{H}_2\text{O}$ . The final solution was stirred for 16 h at room temperature. The solids were then centrifuged, washed 3 times with distilled water and dried at 60°C overnight to obtain the samples: Cu(II)/MCM-41 (Cu wt.% = 19.4), Cu(II)/BEA (Cu wt.% = 23.6) and Cu(II)/ $\text{SiO}_2$  (Cu wt.% = 19.8).

Cu(II)-BTC was purchased from Sigma-Aldrich (Basolite® C 300, produced by BASF. Cu wt.% = 26.2).

## Nitroaldol (Henry) reaction

To test the basic character of selected PBAs, the nitroaldol (Henry) reaction was carried out. To this end, 20 mg of pre-activated catalyst, 1 mmol of benzaldehyde and 5 mmol of nitromethane were added to a crimp cap glass reactor and placed in a pre-heated aluminum block. The reaction was carried out at 90°C, collecting liquid samples of the product mixture after 48 and 96 h reaction time. The products were analyzed by GC (Shimadzu 2014 GC equipped with a FID detector and a CP-Sil 5 CB column) and GC-MS (Agilent 6890 gas chromatograph, equipped with a HP-5MS column, coupled to a 5973 MSD mass spectrometer).

Table S1. Elemental analysis of Zn(II) exchanged samples and the remaining supernatant after the ion exchange process

| PBA                                                                          | Zn(II) salt          | Concentration (mM) | Time (h) | Cu (wt.%) | Zn (wt.%) | Co (wt.%) | Cu <sub>loss</sub> <sup>a</sup> (wt.%) | IED <sub>Zn</sub> <sup>b</sup> (%) |
|------------------------------------------------------------------------------|----------------------|--------------------|----------|-----------|-----------|-----------|----------------------------------------|------------------------------------|
| CuCl <sub>2</sub> -Co                                                        |                      | -                  | -        | 35.8      | -         | 17.6      | -                                      | -                                  |
| Cu(OAc) <sub>2</sub> -Co                                                     |                      | -                  | -        | 38.0      | -         | 17.0      | -                                      | -                                  |
| [Zn(OAc) <sub>2</sub> ] <sub>0.01</sub> @Cu <sub>0.99</sub> -Co              | Zn(OAc) <sub>2</sub> | 50                 | 16       | 33.6      | 0.254     | 18.1      | 1.05                                   | 6.15                               |
| [Zn(OAc) <sub>2</sub> ] <sub>0.09</sub> @Cu <sub>0.91</sub> -Co              | Zn(OAc) <sub>2</sub> | 100                | 16       | 31.1      | 3.01      | 18.0      | 3.05                                   | 13.1                               |
| [Zn(OAc) <sub>2</sub> ] <sub>0.12</sub> @Cu <sub>0.88</sub> -Co <sup>c</sup> | Zn(OAc) <sub>2</sub> | 100                | 16       | 29.6      | 4.09      | 18.1      | 5.02                                   | 17.3                               |
| [Zn(OAc) <sub>2</sub> ] <sub>0.77</sub> @Cu <sub>0.23</sub> -Co <sup>d</sup> | Zn(OAc) <sub>2</sub> | 100                | 16       | 8.03      | 27.0      | 17.6      | 25.6                                   | 77.6                               |
| [Zn(OAc) <sub>2</sub> ] <sub>0.78</sub> @Cu <sub>0.22</sub> -Co <sup>e</sup> | Zn(OAc) <sub>2</sub> | 100                | 16       | 7.60      | 26.8      | 17.8      | 27.5                                   | 78.8                               |
| [ZnCl <sub>2</sub> ] <sub>0.30</sub> @Cu <sub>0.70</sub> -Co                 | ZnCl <sub>2</sub>    | 50                 | 16       | 24.1      | 10.5      | 17.8      | 10.1                                   | 32.7                               |
| [ZnCl <sub>2</sub> ] <sub>0.46</sub> @Cu <sub>0.54</sub> -Co                 | ZnCl <sub>2</sub>    | 100                | 16       | 18.9      | 16.2      | 17.7      | 16.5                                   | 47.2                               |
| [ZnCl <sub>2</sub> ] <sub>0.62</sub> @Cu <sub>0.38</sub> -Co <sup>e</sup>    | ZnCl <sub>2</sub>    | 100                | 16       | 12.8      | 22.1      | 17.7      | 22.1                                   | 64.2                               |
| [ZnCl <sub>2</sub> ] <sub>0.63</sub> @Cu <sub>0.37</sub> -Co <sup>d</sup>    | ZnCl <sub>2</sub>    | 100                | 16       | 13.2      | 21.8      | 17.7      | 22.2                                   | 63.1                               |
| Zn-Co                                                                        | -                    | -                  | -        | -         | 32.0      | 18.7      | -                                      | -                                  |

Starting material: CuCl<sub>2</sub>-Co PBA. <sup>a</sup> Cu wt.% loss of the sample, based on the concentration of Cu released into solution during the exchange process. <sup>b</sup> Atomic ion exchange efficiency defined as atoms of Cu exchanged per atoms of Cu present in CuCl<sub>2</sub>-Co PBA. <sup>c</sup> The ion exchange process was carried out at 40 °C. <sup>d</sup> The ion exchange process was carried out at 60 °C. <sup>e</sup> The ion exchange process was carried out at 80 °C.

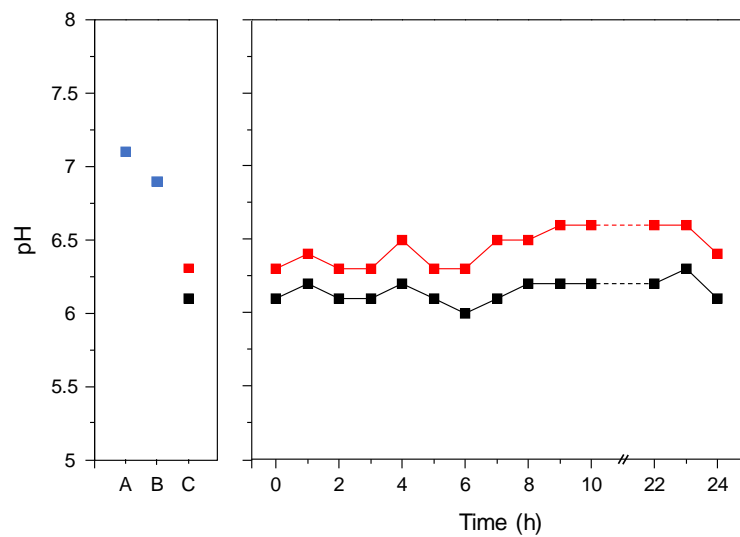

Figure S1. Solution pH during the Cu(II) exchange process with  $\text{Cu}(\text{ClO}_4)_2$  (red) and  $\text{Cu}(\text{OAc})_2$  (black). A: pH of water. B: pH of water + Zn-Co PBA (1 g/L). C: pH of a 1g/L solution of  $\text{Cu}(\text{OCl}_4)_2$  (red) and  $\text{Cu}(\text{OAc})_2$  (black).

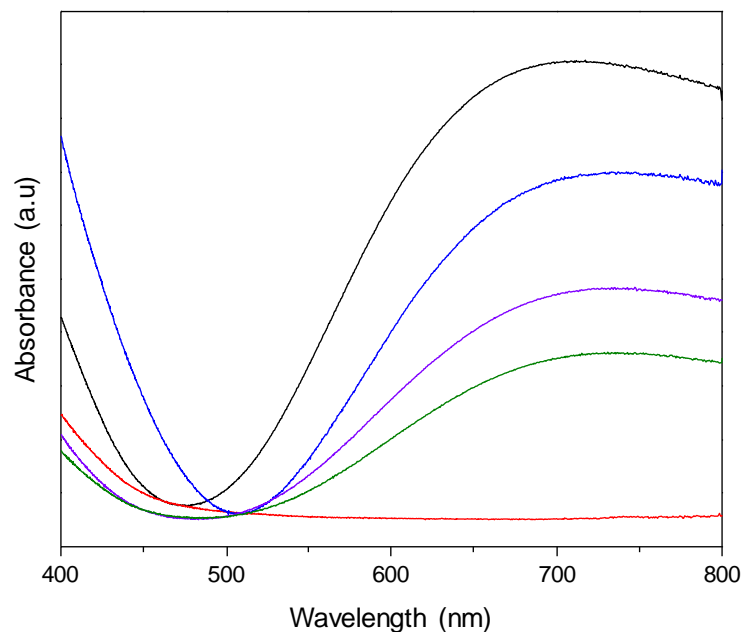

Figure S2. UV/vis spectra of Zn-Co (red),  $[\text{Cu}(\text{OAc})_2]_{0.20}@\text{Zn}_{0.80}\text{-Co}$  (green),  $[\text{Cu}(\text{OAc})_2]_{0.45}@\text{Zn}_{0.55}\text{-Co}$  (violet),  $[\text{Cu}(\text{OAc})_2]_{0.90}@\text{Zn}_{0.10}\text{-Co}$  (blue) and  $\text{CuCl}_2\text{-Co PBA}$  (black).

No band corresponding to the presence of  $\text{Co}(\text{II})$  – expected around 500 nm – was observed in the spectra of any of the studied samples, which exhibit only one broad band, assigned to the d-d transitions of  $\text{Cu}(\text{II})$ .<sup>3-5</sup> This not only indicates the presence of  $\text{Cu}(\text{II})$  in the PBA structure after ion exchange, but also that the  $[\text{Co}(\text{CN})_6]^{3-}$  do not undergo a redox process. This confirms that a mechanism similar to that observed in electrochemical insertions is not the main pathway of the  $\text{Cu}(\text{II})$  exchange.

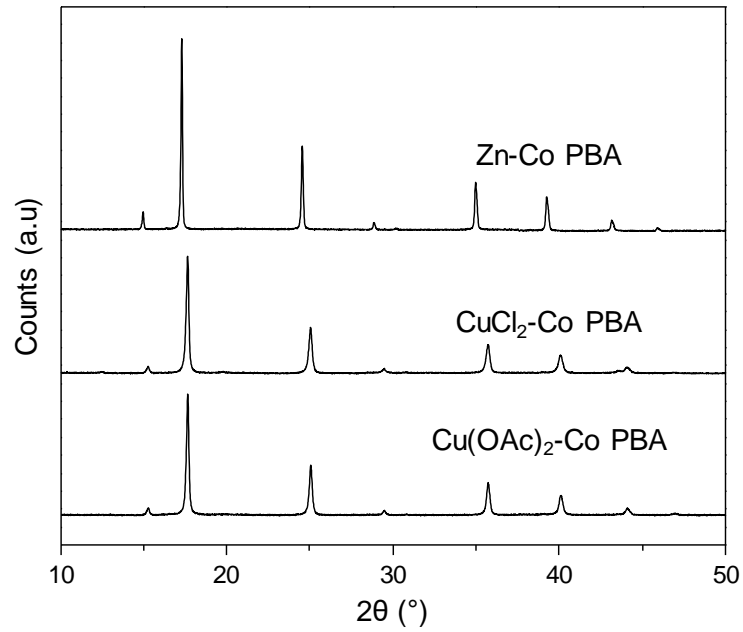

Figure S3. XRD patterns of Zn-Co, CuCl<sub>2</sub>-Co and Cu(OAc)<sub>2</sub>-Co PBA.

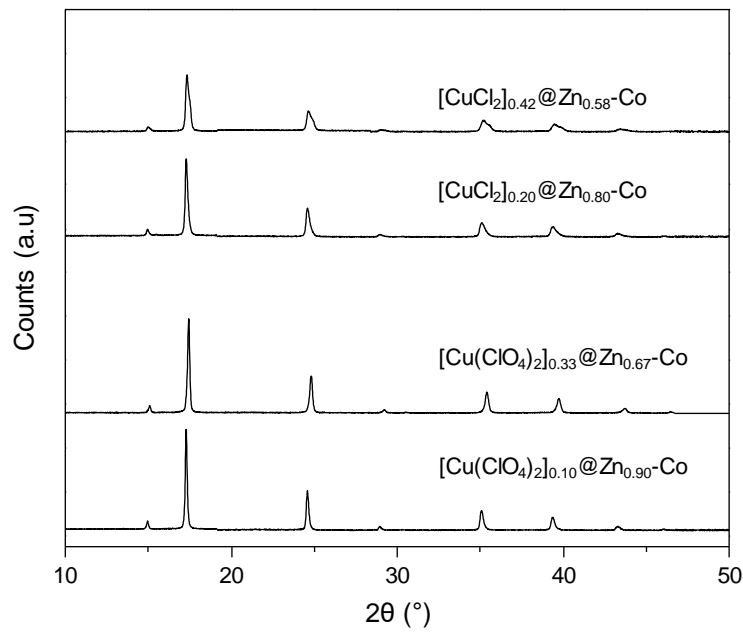

Figure S4. XRD patterns of the [CuCl<sub>2</sub>]<sub>x</sub>@Zn<sub>1-x</sub>-Co and [Cu(ClO<sub>4</sub>)<sub>2</sub>]<sub>x</sub>@Zn<sub>1-x</sub>-Co PBAs.

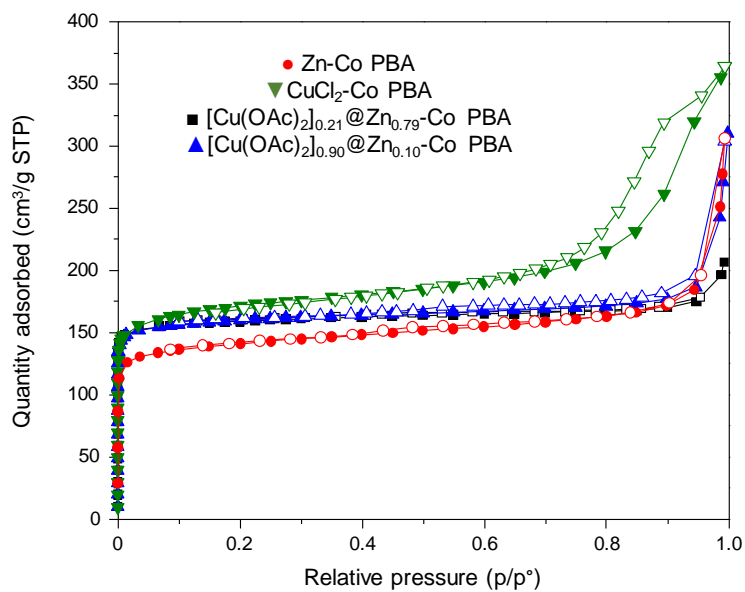

Figure S5. Nitrogen physisorption isotherms of selected PBA samples. Filled symbols denote adsorption and open symbols denote desorption.

Table S2. Textural properties of selected PBA samples determined from N<sub>2</sub> physisorption at -196.15 °C.

| PBA                                                             | $S_{\text{BET}}$ (m <sup>2</sup> /g) | $V_{\text{micro}}$ (cm <sup>3</sup> /g) | $S_{\text{ext}}$ (m <sup>2</sup> /g) |
|-----------------------------------------------------------------|--------------------------------------|-----------------------------------------|--------------------------------------|
| Zn-Co                                                           | 453                                  | 0.172                                   | 106                                  |
| CuCl <sub>2</sub> -Co                                           | 540                                  | 0.221                                   | 145                                  |
| [Cu(OAc) <sub>2</sub> ] <sub>0.21</sub> @Zn <sub>0.79</sub> -Co | 479                                  | 0.202                                   | 60                                   |
| [Cu(OAc) <sub>2</sub> ] <sub>0.90</sub> @Zn <sub>0.10</sub> -Co | 482                                  | 0.217                                   | 72                                   |

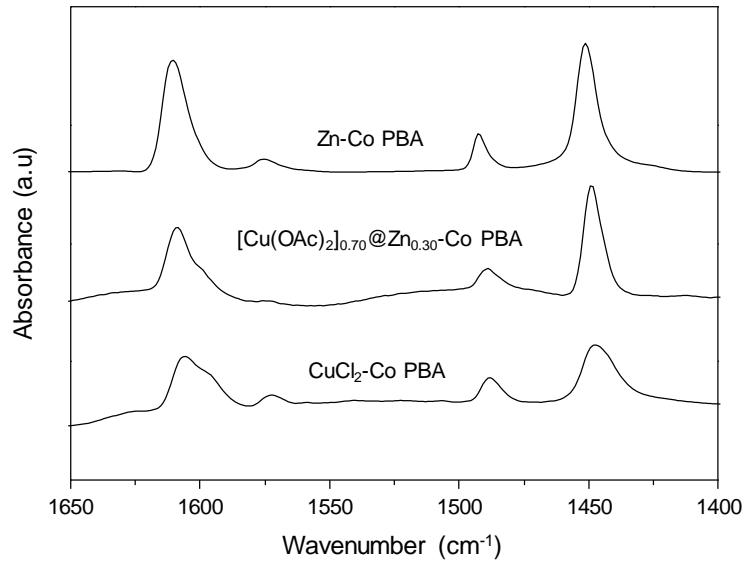

Figure S6. Difference IR spectra of adsorbed pyridine (normalized to 10 mg of PBA/cm<sup>2</sup>) for selected PBA samples.

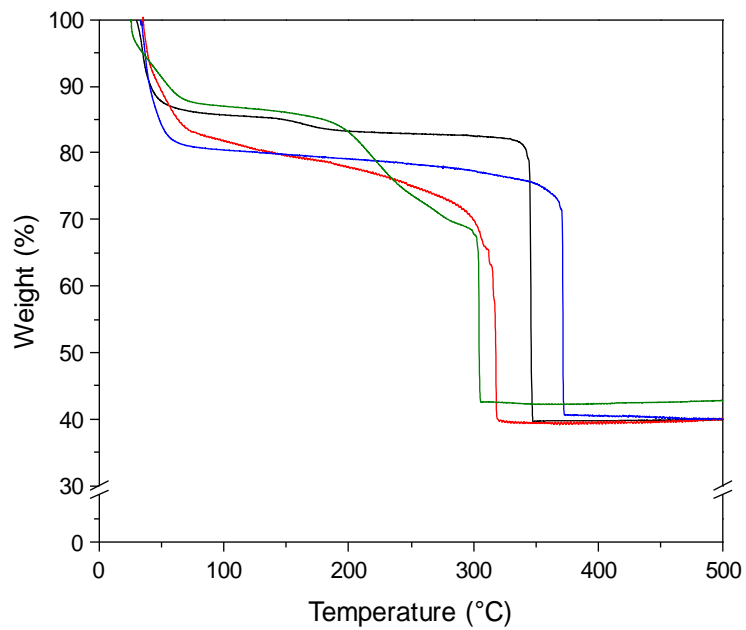

Figure S7. TGA profiles for Zn-Co PBA (black), CuCl<sub>2</sub>-Co PBA (blue), [Cu(OAc)<sub>2</sub>]<sub>0.21</sub>@Zn<sub>0.79</sub>-Co PBA (red) and [Cu(OAc)<sub>2</sub>]<sub>0.90</sub>@Zn<sub>0.10</sub>-Co PBA (green).



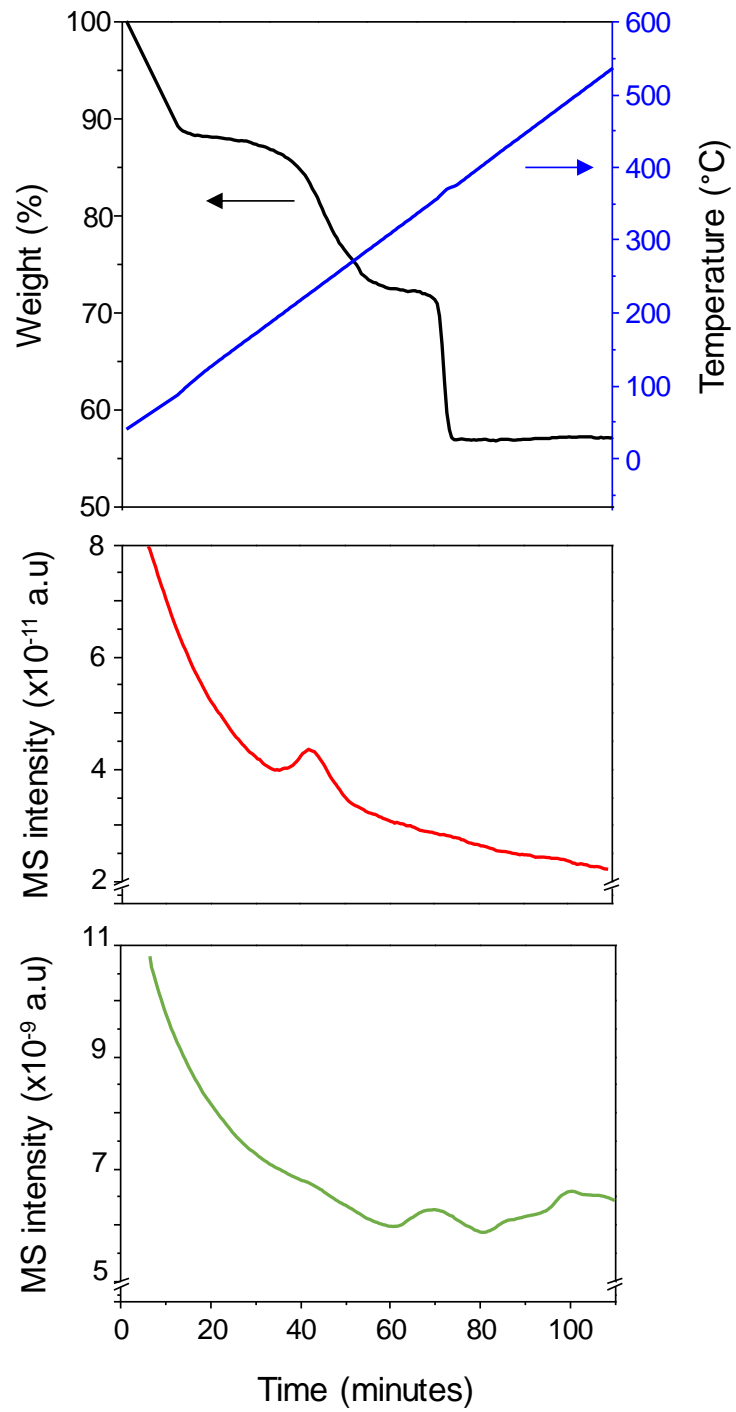

Figure S8. Thermal decomposition of  $[\text{Cu}(\text{OAc})_2]_{0.90}@\text{Zn}_{0.10}\text{-Co PBA}$  investigated by monitoring the  $m/z$  values: 44 (corresponding to  $\text{CO}_2$ , green line) and 60 (corresponding to  $\text{CH}_3\text{COOH}$ , red line).

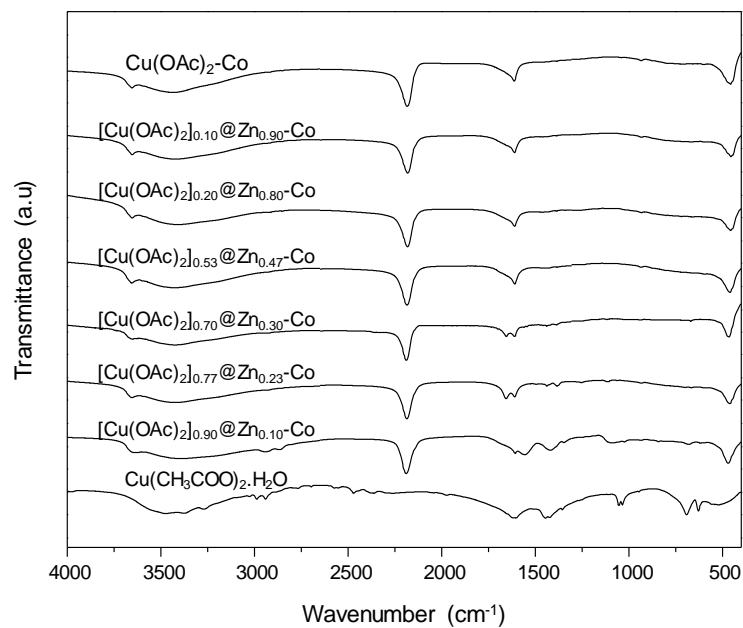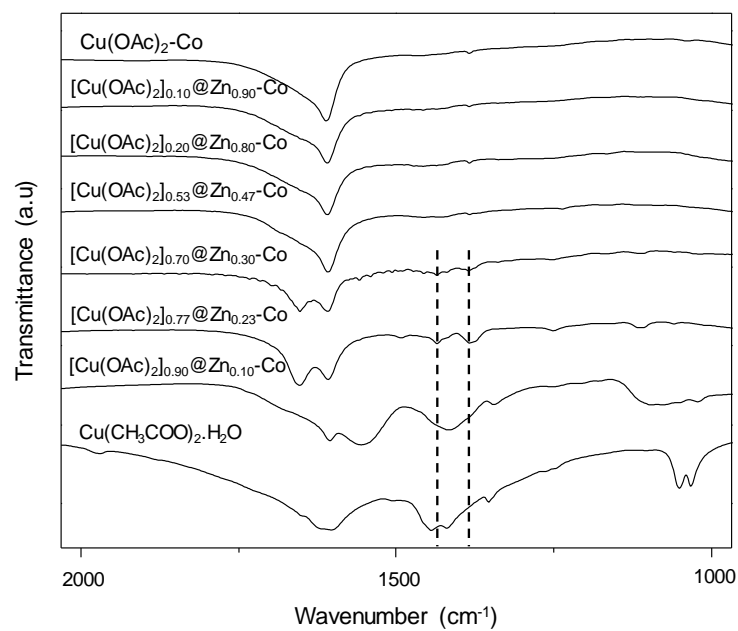

Figure S9. Top: FTIR spectra of selected PBA samples. Bottom: focus on the -COO- stretching region.

Table S3. Catalytic activity of the prepared PBAs for the A<sup>3</sup> coupling reaction of phenylacetylene, piperidine and benzaldehyde.

| PBA                                                                           | X (%) <sup>a</sup> | S (%) <sup>b</sup> | Y (%) |
|-------------------------------------------------------------------------------|--------------------|--------------------|-------|
| Zn-Co                                                                         | 4                  | >99                | 4     |
| [Cu(ClO <sub>4</sub> ) <sub>2</sub> ] <sub>0.10</sub> @Zn <sub>0.90</sub> -Co | 5                  | >99                | 5     |
| [Cu(ClO <sub>4</sub> ) <sub>2</sub> ] <sub>0.33</sub> @Zn <sub>0.67</sub> -Co | 25                 | 95 <sup>c</sup>    | 24    |
| [Cu(OAc) <sub>2</sub> ] <sub>0.11</sub> @Zn <sub>0.89</sub> -Co               | 12                 | >99                | 12    |
| [Cu(OAc) <sub>2</sub> ] <sub>0.12</sub> @Zn <sub>0.88</sub> -Co               | 13                 | >99                | 13    |
| [Cu(OAc) <sub>2</sub> ] <sub>0.15</sub> @Zn <sub>0.85</sub> -Co               | 19                 | 98 <sup>c</sup>    | 19    |
| [Cu(OAc) <sub>2</sub> ] <sub>0.19</sub> @Zn <sub>0.81</sub> -Co               | 22                 | >99                | 22    |
| [Cu(OAc) <sub>2</sub> ] <sub>0.20</sub> @Zn <sub>0.80</sub> -Co               | 26                 | >99                | 26    |
| [Cu(OAc) <sub>2</sub> ] <sub>0.21</sub> @Zn <sub>0.79</sub> -Co               | 27                 | >99                | 27    |
| [Cu(OAc) <sub>2</sub> ] <sub>0.45</sub> @Zn <sub>0.55</sub> -Co               | 55                 | 96 <sup>c</sup>    | 53    |
| [Cu(OAc) <sub>2</sub> ] <sub>0.53</sub> @Zn <sub>0.47</sub> -Co               | 62                 | 87 <sup>c</sup>    | 54    |
| [Cu(OAc) <sub>2</sub> ] <sub>0.67</sub> @Zn <sub>0.33</sub> -Co               | 65                 | 90 <sup>c</sup>    | 59    |
| [Cu(OAc) <sub>2</sub> ] <sub>0.70</sub> @Zn <sub>0.30</sub> -Co               | 82                 | 90 <sup>c</sup>    | 74    |
| [Cu(OAc) <sub>2</sub> ] <sub>0.77</sub> @Zn <sub>0.23</sub> -Co               | >99                | 98 <sup>c</sup>    | 98    |
| [Cu(OAc) <sub>2</sub> ] <sub>0.90</sub> @Zn <sub>0.10</sub> -Co               | 96                 | 98 <sup>c</sup>    | 94    |
| [CuCl <sub>2</sub> ] <sub>0.20</sub> @Zn <sub>0.80</sub> -Co                  | 18                 | 88 <sup>c</sup>    | 16    |
| [CuCl <sub>2</sub> ] <sub>0.42</sub> @Zn <sub>0.58</sub> -Co                  | 53                 | 98 <sup>c</sup>    | 52    |
| [CuCl <sub>2</sub> ] <sub>0.55</sub> @Zn <sub>0.45</sub> -Co                  | 55                 | 95 <sup>c</sup>    | 52    |
| [CuCl <sub>2</sub> ] <sub>0.83</sub> @Zn <sub>0.17</sub> -Co                  | 61                 | 97 <sup>c</sup>    | 59    |
| CuCl <sub>2</sub> -Co <sup>b</sup>                                            | 28                 | 60 <sup>c</sup>    | 17    |
| Cu(OAc) <sub>2</sub> -Co <sup>c</sup>                                         | 36                 | 66 <sup>c</sup>    | 24    |
| Cu <sub>0.14</sub> Zn <sub>0.86</sub> -Co                                     | 7                  | 95 <sup>c</sup>    | 7     |
| Cu <sub>0.26</sub> Zn <sub>0.74</sub> -Co                                     | 11                 | 96 <sup>c</sup>    | 11    |
| Cu <sub>0.41</sub> Zn <sub>0.59</sub> -Co                                     | 51                 | >99                | 51    |
| Cu <sub>0.67</sub> Zn <sub>0.33</sub> -Co                                     | 53                 | >99                | 53    |
| Cu <sub>0.86</sub> Zn <sub>0.14</sub> -Co                                     | 60                 | 93 <sup>c</sup>    | 56    |
| Cu <sub>0.96</sub> Zn <sub>0.04</sub> -Co                                     | 54                 | 94 <sup>c</sup>    | 51    |

<sup>a</sup> Conversion of phenylacetylene. <sup>b</sup> Selectivity to the A<sup>3</sup> product based on phenylacetylene. <sup>c</sup> Acetophenone was the only phenylacetylene-derived side-product detected. Reaction conditions: phenylacetylene (0.05 mmol), piperidine (0.1 mmol) and benzaldehyde (0.1 mmol). 110°C. 10 mg of PBA. 6 h reaction time.

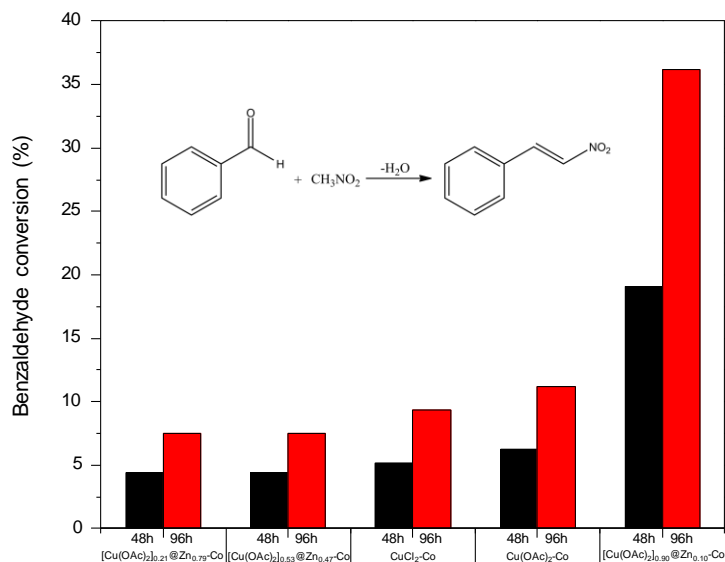

Figure S10. Benzaldehyde conversion in the nitroaldol (Henry) reaction of nitromethane (5 mmol) and benzaldehyde (1 mmol) at 90°C over selected PBA samples (20 mg).

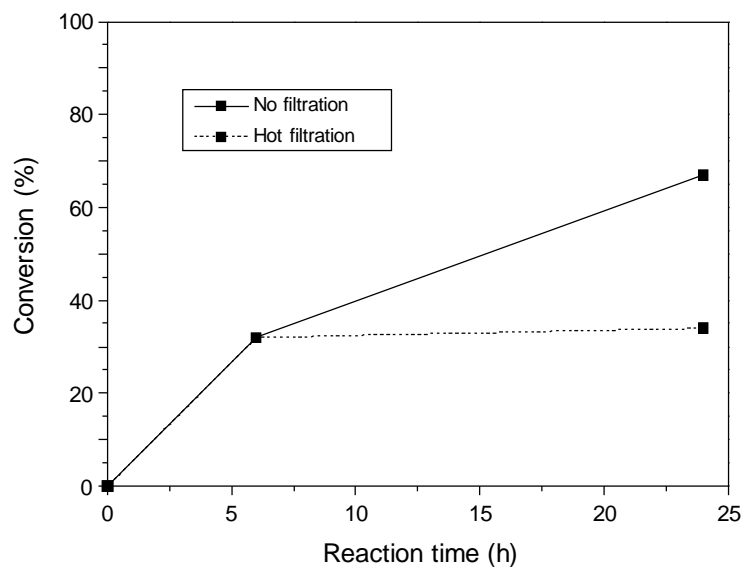

Figure S11. Conversion of phenylacetylene in the A<sup>3</sup> coupling of phenylacetylene (0.05 mmol), piperidine (0.1 mmol) and benzaldehyde (0.1 mmol) at 110°C over 1 mg of [Cu(OAc)<sub>2</sub>]<sub>0.90</sub>@Zn<sub>0.10</sub>-Co. Dashed lines represent the conversion after removal of the catalyst in the hot filtration test.

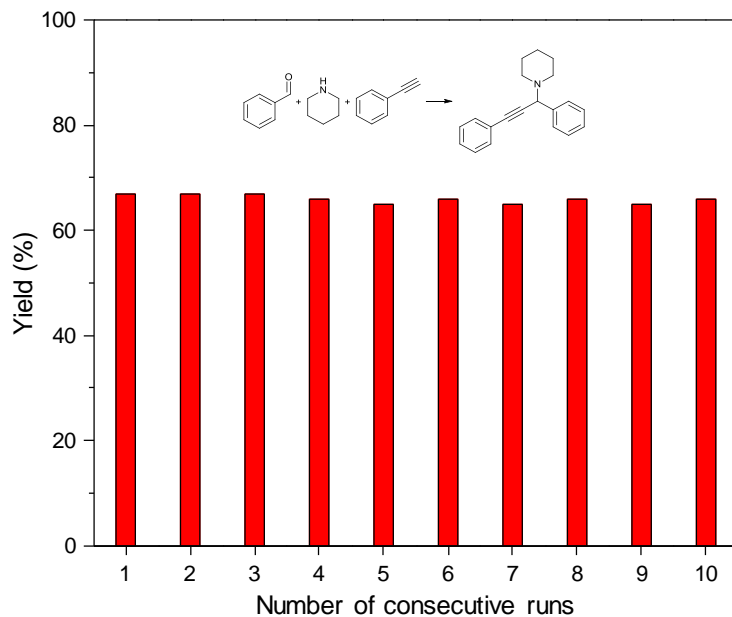

Figure S12. Recycling tests for the A<sup>3</sup> coupling of phenylacetylene (0.05 mmol), piperidine (0.1 mmol) and benzaldehyde (0.1 mmol) at 110°C over 1 mg of [Cu(OAc)<sub>2</sub>]<sub>0.90</sub>@Zn<sub>0.10</sub>-Co. Yield of A<sup>3</sup> product after 24 h reaction time.

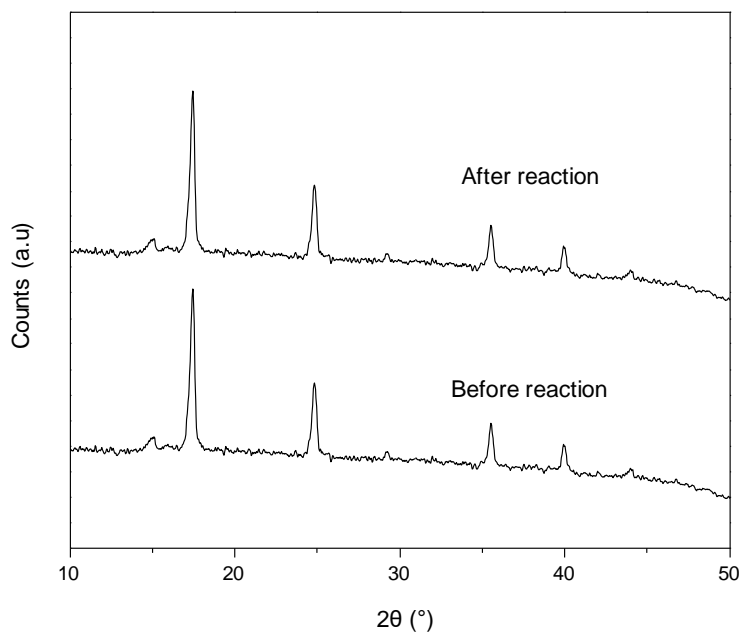

Figure S13. XRD pattern of [Cu(OAc)<sub>2</sub>]<sub>0.90</sub>@Zn<sub>0.10</sub>-Co PBA before and after the A<sup>3</sup> coupling reaction. Reaction conditions: phenylacetylene (0.05 mmol), piperidine (0.1 mmol) and benzaldehyde (0.1 mmol). 110°C. 10 mg of catalyst. 24 h reaction time.

## References

1. C. Marquez, F. G. Cirujano, C. Van Goethem, I. Vankelecom, D. De Vos and T. De Baerdemaeker. *Catal. Sci. Technol.*, 2018, **8**, 2061-2065.
2. M. Grün, I. Lauer and K. K. Unger. *Adv. Mater.*, 1991, **9**, 254-257.
3. H. Zhang, C. Li, D. Chen, J. Zhao, X. Jiao and Y. Xia. *CrystEngComm*, 2017, **19**, 2057–2064.
4. N. Shimamoto, S-i. Ohkoshi, O. Sato and K. Hashimoto. *Inorg. Chem.* 2002, **41**, 678-684.
5. S. Godlewska, J. Jezierska, K. Baranowska, E. Augustin and A. Dolega, *Polyhedron*, 2013, **65**, 288–297.
